# Supplementary material
Source: HighWire-hosted journal article supplement (https://jitc.bmj.com/content/13/4/e011314)

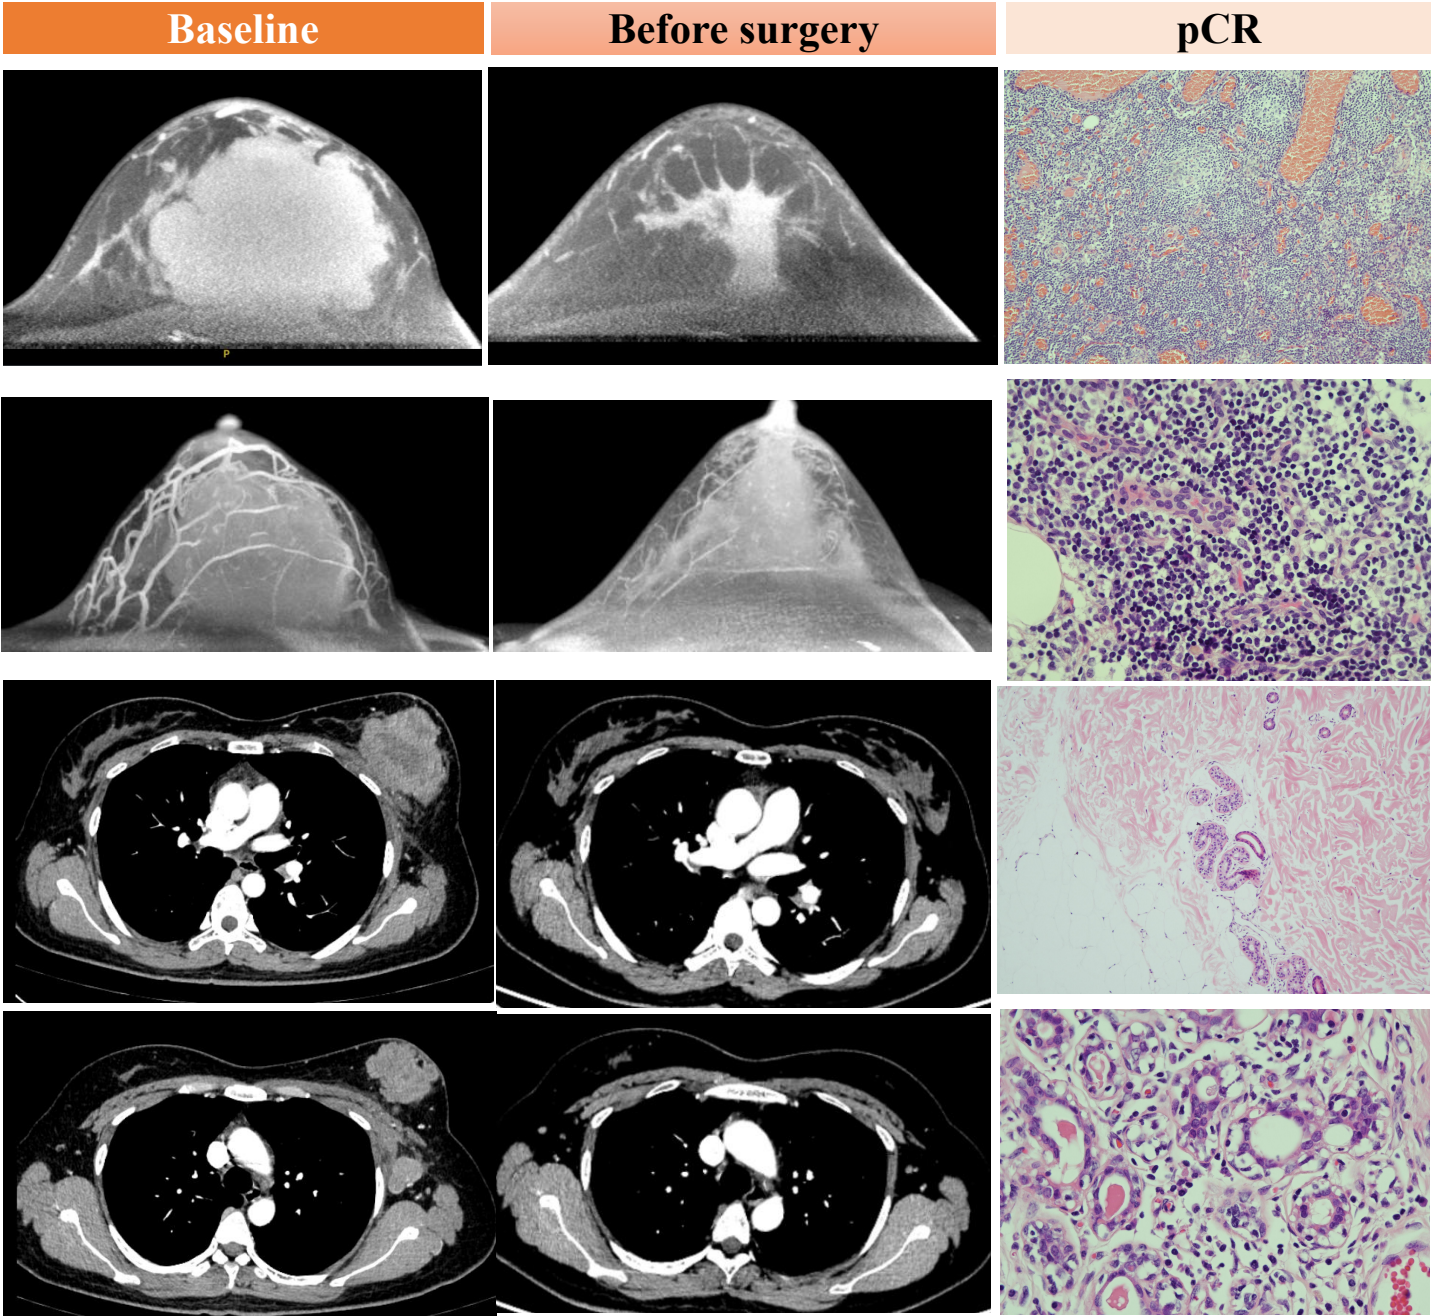

Supplement: inline-supplementary-material-3 [file inline-supplementary-material-3.pdf]

A

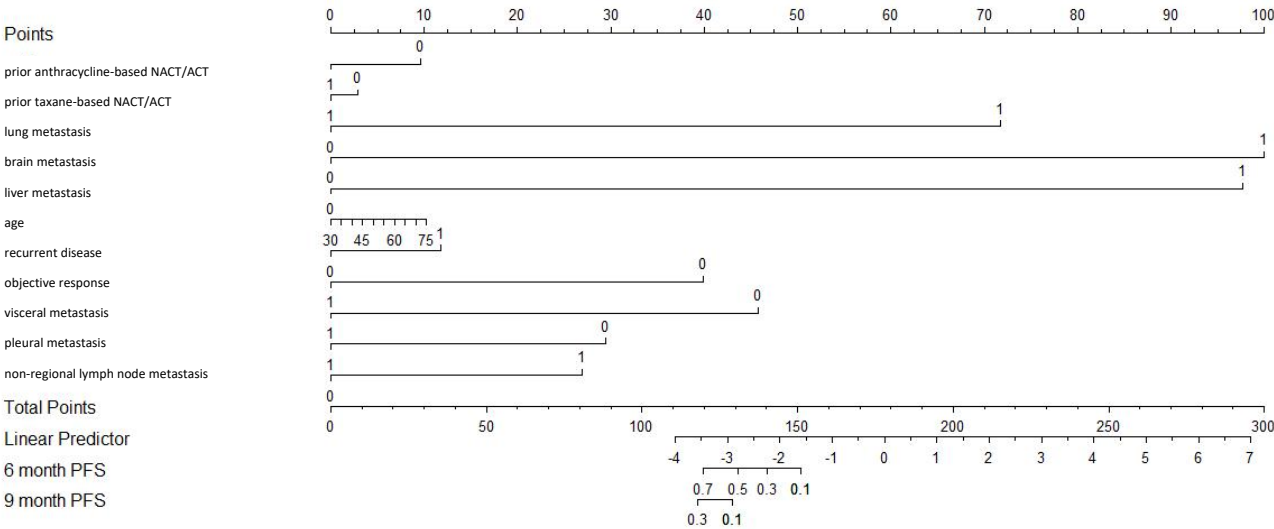

B

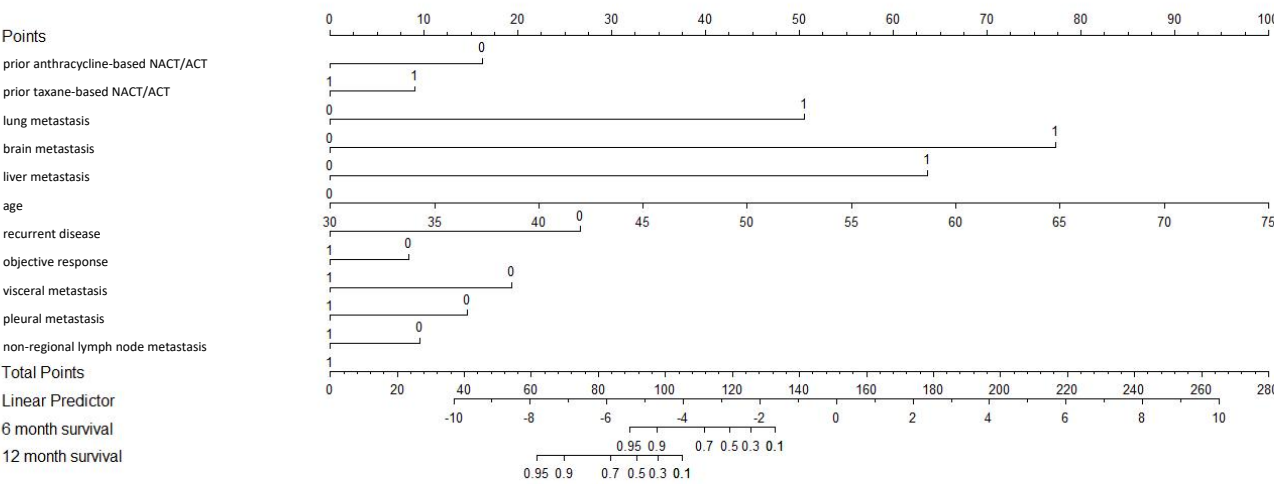

Supplement: inline-supplementary-material-5 [file inline-supplementary-material-5.pdf]
